# Supplementary material for: Insights on Pseudomonas aeruginosa Carbohydrate Binding from Profiles of Cystic Fibrosis Isolates Using Multivalent Fluorescent Glycopolymers Bearing Pendant Monosaccharides
Source: MDPI journal article supplement (doi:10.3390/microorganisms12040801), 2024-04-16
Supplement: s1 [file s1]

**Insights on *Pseudomonas aeruginosa* Carbohydrate Binding from Profiles of Cystic Fibrosis Isolates using Multivalent Fluorescent Glycopolymers Bearing Pendant Monosaccharides**

Deborah L. Chance, Wei Wang, James K. Waters, Thomas P. Mawhinney  
University of Missouri, Columbia, MO, 65211, USA

**Supplemental File S3**

**Additional Binding Results**

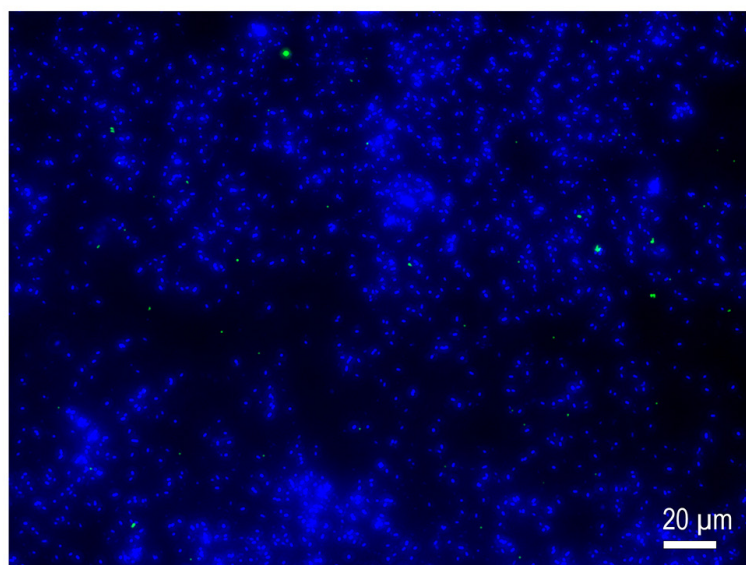

**Figure S3.1.** Fluorescence micrograph of minimally washed bacterial-fluorescent glycopolymer suspension in binding assay. Minor increase in bacterial-glycopolymer binding was observed for ATCC BAA47 with the  $\alpha$ -Gal-PAA-Fluor when the bacteria were not washed extensively following the binding reaction (i.e. ~ 2% rather than ~ 1% in standard assay). In this example, an aliquot of the bacterial-glycopolymer binding reaction, following 2 h incubation, was applied to a glass slide, air-dried, and the unbound materials removed by one rinse with PBS. The specimen was then subjected to fluorescence microscopy.

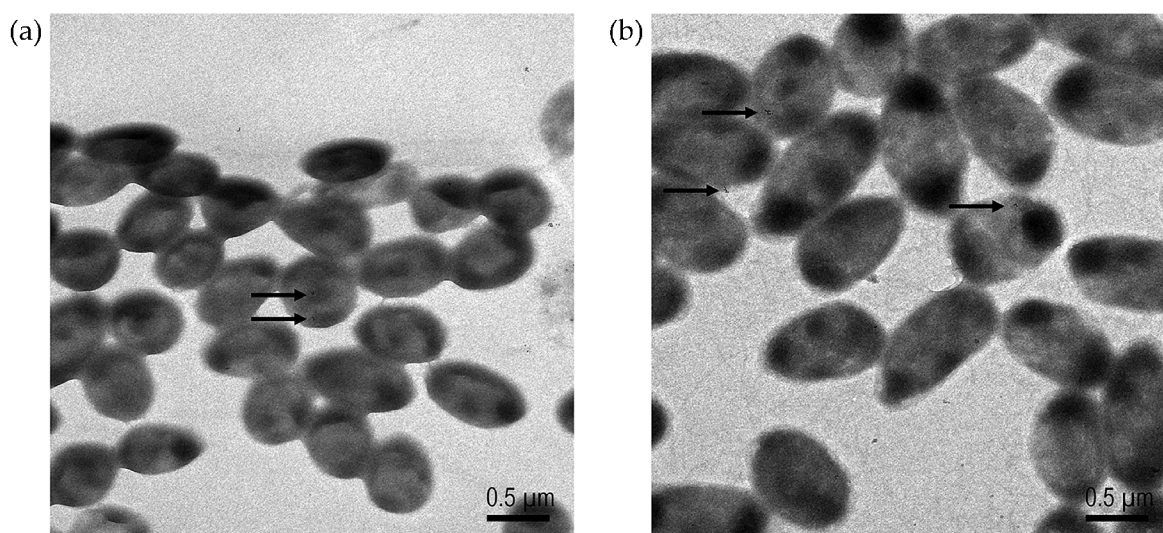

**Figure S3.2.** Transmission electron micrographs of gold-conjugates of fluorescein-immunolabeled  $\beta$ -Gal-PAA-Fluor minimally bound to *P. aeruginosa* clinical isolate CF-S 8314-1 (a) and laboratory strain ATCC BAA47 (b). Following binding tests, the bacterial suspensions deposited on Formvar carbon-coated nickel grids were incubated with gold conjugated anti-fluorescein isothiocyanate antibody. Only scarce gold-labeling was observed in both strains' tests with the  $\beta$ -galactose glycopolymer (arrowheads). These data are consistent with microscopic and spectroscopic analyses showing relatively small amounts of binding of  $\beta$ -Gal-PAA-Fluor to the various *P. aeruginosa* strains.
