# Supplementary material for: Insights on Pseudomonas aeruginosa Carbohydrate Binding from Profiles of Cystic Fibrosis Isolates Using Multivalent Fluorescent Glycopolymers Bearing Pendant Monosaccharides
Source: MDPI journal article supplement (doi:10.3390/microorganisms12040801), 2024-04-16
Supplement: s1 [file s1]

# Insights on *Pseudomonas aeruginosa* Carbohydrate Binding from Profiles of Cystic Fibrosis Isolates using Multivalent Fluorescent Glycopolymers Bearing Pendant Monosaccharides

Deborah L. Chance, Wei Wang, James K. Waters, Thomas P. Mawhinney  
University of Missouri, Columbia, MO, 65211, USA

## Supplemental File S5

### Probing *P. aeruginosa* Characteristics for Correlations with Enhanced Binding

**Table S5.1.** Features of *P. aeruginosa* in collection sorted by source

| Respiratory or<br>Other Source | Strains with Phenotype |           |          | Strains with Structural<br>Feature(s) by TEM, n |        |        |
|--------------------------------|------------------------|-----------|----------|-------------------------------------------------|--------|--------|
|                                | Source (n)             | Phenotype | Total, n | F+, P+                                          | F+, P- | F-, P+ |
| Respiratory                    | CF Sputum (8)          | NonMucoid | 3        | 2                                               | 1      | 0      |
|                                |                        | Mucoid    | 3        | 2                                               | 1      | 0      |
|                                |                        | Motile    | 2        | 2                                               | 0      | 0      |
|                                | CF Throat (5)          | NonMucoid | 1        | 0                                               | 1      | 0      |
|                                |                        | Mucoid    | 1        | 1                                               | 0      | 0      |
|                                |                        | Motile    | 3        | 3                                               | 0      | 0      |
|                                | NCF Sputum (2)         | NonMucoid | 0        | n.a.                                            | n.a.   | n.a.   |
|                                |                        | Mucoid    | 1        | 0                                               | 0      | 1      |
|                                |                        | Motile    | 1        | 0                                               | 0      | 1      |
| Other                          | Other (3)              | Nonmotile | 0        | n.a.                                            | n.a.   | n.a.   |
|                                |                        | Mucoid    | 0        | n.a.                                            | n.a.   | n.a.   |
|                                |                        | Motile    | 3        | 2                                               | 1      | 0      |

Abbreviations: F+, flagella positive; F-, flagella not observed; P+, pili observed at least occasionally; P-, pili not observed; n, number of strains with the characteristic; n.a., not applicable as no strains in the category to analyse for the feature.

**Table S5.2.** *P. aeruginosa* "high binder" glycopolymers with features of high binding strains <sup>1,2</sup>

| Glycopolymer     | % of PA in collection (n) | Source or Feature <sup>3</sup> Frequency % of Higher Binding Strains, (n) |           |         |         |          |         |         |
|------------------|---------------------------|---------------------------------------------------------------------------|-----------|---------|---------|----------|---------|---------|
|                  |                           | Respiratory                                                               | NonMucoid | Mucoid  | Motile  | F+, P+   | F+, P-  | F-, P+  |
| $\alpha$ -Gal    | 44% (8)                   | 100% (8)                                                                  | 25% (2)   | 38% (3) | 38% (3) | 63% (5)  | 13% (1) | 25% (2) |
| $\beta$ -GalNAc  | 56% (10)                  | 100% (10)                                                                 | 40% (4)   | 30% (3) | 30% (3) | 70% (7)  | 20% (2) | 10% (1) |
| $\beta$ -Gal3S   | 33% (6)                   | 83% (5)                                                                   | 33% (2)   | 17% (1) | 50% (3) | 83% (5)  | 0% (0)  | 17% (1) |
| $\alpha$ -Neu5Ac | 11% (2)                   | 100% (2)                                                                  | 50% (1)   | 0% (0)  | 50% (1) | 100% (2) | 0% (0)  | 0% (0)  |

<sup>1</sup> Glycopolymers in this study revealed as "high binders" for 1 or more *P. aeruginosa* in this collection included the polyacrylamide-based multivalent fluoresceinated glycopolymers with pendant monosaccharides of galactose (Gal), N-acetylgalactosamine (GalNAc), galactose -3-O-sulfate (Gal3S), or sialic acid (Neu5Ac). <sup>2</sup> "High Binding" status was denoted in binding assays where enumeration of fluorescent glycopolymer-bound *P. aeruginosa* was determined microscopically, and there were an average of > 1000 fluorescent cells per microscopic field analyzed. <sup>3</sup> Abbreviations: F+, flagella positive; F-, flagella not observed; P+, pili observed at least occasionally; P-, pili not observed; n, number of strains with the characteristic.

**Table S5.3.** *P. aeruginosa* high binding glycopolymers data from Table 3  
sorted by colony phenotype

| Isolate or<br>Strain Source | Culture ID (#) | Colony Phenotype | Structural<br>Features<br>Confirmed | Glycopolymer Binding Observed Microscopically as Fluorescent<br>Cells/Field, and Spectrometrically as Fluorescence Intensity (AU) |                                                                  |                                                                  |
|-----------------------------|----------------|------------------|-------------------------------------|-----------------------------------------------------------------------------------------------------------------------------------|------------------------------------------------------------------|------------------------------------------------------------------|
|                             |                |                  |                                     | > 1000 cells (avg)                                                                                                                |                                                                  | > 6000 AU                                                        |
|                             |                |                  |                                     |                                                                                                                                   |                                                                  |                                                                  |
| CF Sputum                   | CF-S 8314-1    | 1                | nonmucoid                           | flagella, pili                                                                                                                    | $\alpha$ -Gal, $\beta$ -GalNAc, $\beta$ -Gal3S, $\alpha$ -Neu5Ac | $\alpha$ -Gal, $\beta$ -GalNAc, $\beta$ -Gal3S, $\alpha$ -Neu5Ac |
| CF Sputum                   | CF-S 8981-1    | 3                | nonmucoid                           | flagella                                                                                                                          | $\beta$ -GalNAc                                                  | $\alpha$ -Gal, $\beta$ -GalNAc, $\beta$ -Gal3S                   |
| CF Sputum                   | CF-S 3443      | 8                | nonmucoid, (SCV)                    | flagella, pili                                                                                                                    | $\alpha$ -Gal, $\beta$ -GalNAc, $\beta$ -Gal3S                   | $\alpha$ -Gal, $\beta$ -GalNAc, $\beta$ -Gal3S, $\alpha$ -Neu5Ac |
| CF Throat                   | CF-T 3371      | 9                | nonmucoid                           | flagella                                                                                                                          | $\beta$ -GalNAc                                                  | $\alpha$ -Gal, $\beta$ -GalNAc, $\beta$ -Gal3S                   |
|                             |                |                  |                                     |                                                                                                                                   |                                                                  |                                                                  |
| CF Sputum                   | CF-S 8314-2    | 2                | mucoid                              | flagella                                                                                                                          | $\alpha$ -Gal                                                    | $\alpha$ -Gal, $\beta$ -GalNAc, $\beta$ -Gal3S, $\alpha$ -Neu5Ac |
| CF Sputum                   | CF-S 8981-2    | 4                | mucoid                              | flagella, pili                                                                                                                    | -                                                                | $\alpha$ -Gal, $\beta$ -GalNAc, $\beta$ -Gal3S, $\alpha$ -Neu5Ac |
| CF Sputum                   | CF-S 3396      | 7                | mucoid                              | flagella, pili                                                                                                                    | $\beta$ -GalNAc, $\beta$ -Gal3S                                  | $\alpha$ -Gal, $\beta$ -GalNAc, $\beta$ -Gal3S                   |
| CF Throat                   | CF-T 3372      | 10               | mucoid                              | flagella, pili                                                                                                                    | $\alpha$ -Gal, $\beta$ -GalNAc                                   | $\alpha$ -Gal, $\beta$ -GalNAc, $\beta$ -Gal3S, $\alpha$ -Neu5Ac |
| Non-CF Sputum               | ATCC 33468     | 18               | mucoid                              | pili                                                                                                                              | $\alpha$ -Gal, $\beta$ -GalNAc                                   | $\alpha$ -Gal, $\beta$ -GalNAc, $\beta$ -Gal3S                   |
|                             |                |                  |                                     |                                                                                                                                   |                                                                  |                                                                  |
| CF Sputum                   | CF-S 3318      | 5                | motile                              | flagella, pili                                                                                                                    | $\alpha$ -Gal                                                    | $\alpha$ -Gal, $\beta$ -GalNAc, $\beta$ -Gal3S                   |
| CF Sputum                   | CF-S 3247      | 6                | motile                              | flagella, pili                                                                                                                    | -                                                                | $\alpha$ -Gal, $\beta$ -GalNAc, $\beta$ -Gal3S                   |
| Non-CF Sputum               | NCF-S 3391     | 15               | motile                              | pili                                                                                                                              | $\alpha$ -Gal, $\beta$ -Gal3S                                    | $\alpha$ -Gal, $\beta$ -GalNAc, $\beta$ -Gal3S, $\alpha$ -Neu5Ac |
| CF Throat                   | CF-T 3435      | 11               | motile                              | flagella, pili                                                                                                                    | $\beta$ -GalNAc                                                  | $\alpha$ -Gal, $\beta$ -GalNAc, $\beta$ -Gal3S                   |
| CF Throat                   | CF-T 3437      | 12               | motile                              | flagella, pili                                                                                                                    | $\alpha$ -Gal, $\beta$ -GalNAc, $\beta$ -Gal3S, $\alpha$ -Neu5Ac | $\alpha$ -Gal, $\beta$ -GalNAc, $\beta$ -Gal3S, $\alpha$ -Neu5Ac |
| CF Throat                   | CF-T 3446      | 13               | motile                              | flagella, pili                                                                                                                    | $\beta$ -GalNAc                                                  | $\alpha$ -Gal, $\beta$ -GalNAc, $\beta$ -Gal3S                   |
| Other                       | NCF-H 3380     | 14               | motile                              | flagella, pili                                                                                                                    | $\beta$ -Gal3S                                                   | $\alpha$ -Gal, $\beta$ -GalNAc, $\beta$ -Gal3S                   |
| Other                       | ATCC BAA-47    | 16               | motile                              | flagella                                                                                                                          | -                                                                | $\alpha$ -Gal, $\beta$ -GalNAc, $\beta$ -Gal3S                   |
| Other                       | ATCC 15442     | 17               | motile                              | flagella, pili                                                                                                                    | -                                                                | $\alpha$ -Gal, $\beta$ -GalNAc, $\beta$ -Gal3S                   |
