# Supplementary material for: Insights on Pseudomonas aeruginosa Carbohydrate Binding from Profiles of Cystic Fibrosis Isolates Using Multivalent Fluorescent Glycopolymers Bearing Pendant Monosaccharides
Source: Microorganisms. 2024 Apr 16;12(4):801. doi: 10.3390/microorganisms12040801 (PMC11051836; doi:10.3390/microorganisms12040801)
Supplement: Supplementary file 1 [file microorganisms-12-00801-s001.zip]

Archive with 6 entries (6 files):
- Supplemental File S1.pdf
- Supplemental File S2.pdf
- Supplemental File S3.pdf
- Supplemental File S4.pdf
- Supplemental File S5.pdf
- Supplemental File S6.pdf
